# Supplementary material for: The Conditional Nature of Genetic Interactions: The Consequences of Wild-Type Backgrounds on Mutational Interactions in a Genome-Wide Modifier Screen
Source: PubMed Central journal article supplement (PMC3731224; doi:10.1371/journal.pgen.1003661), 2013-08-01

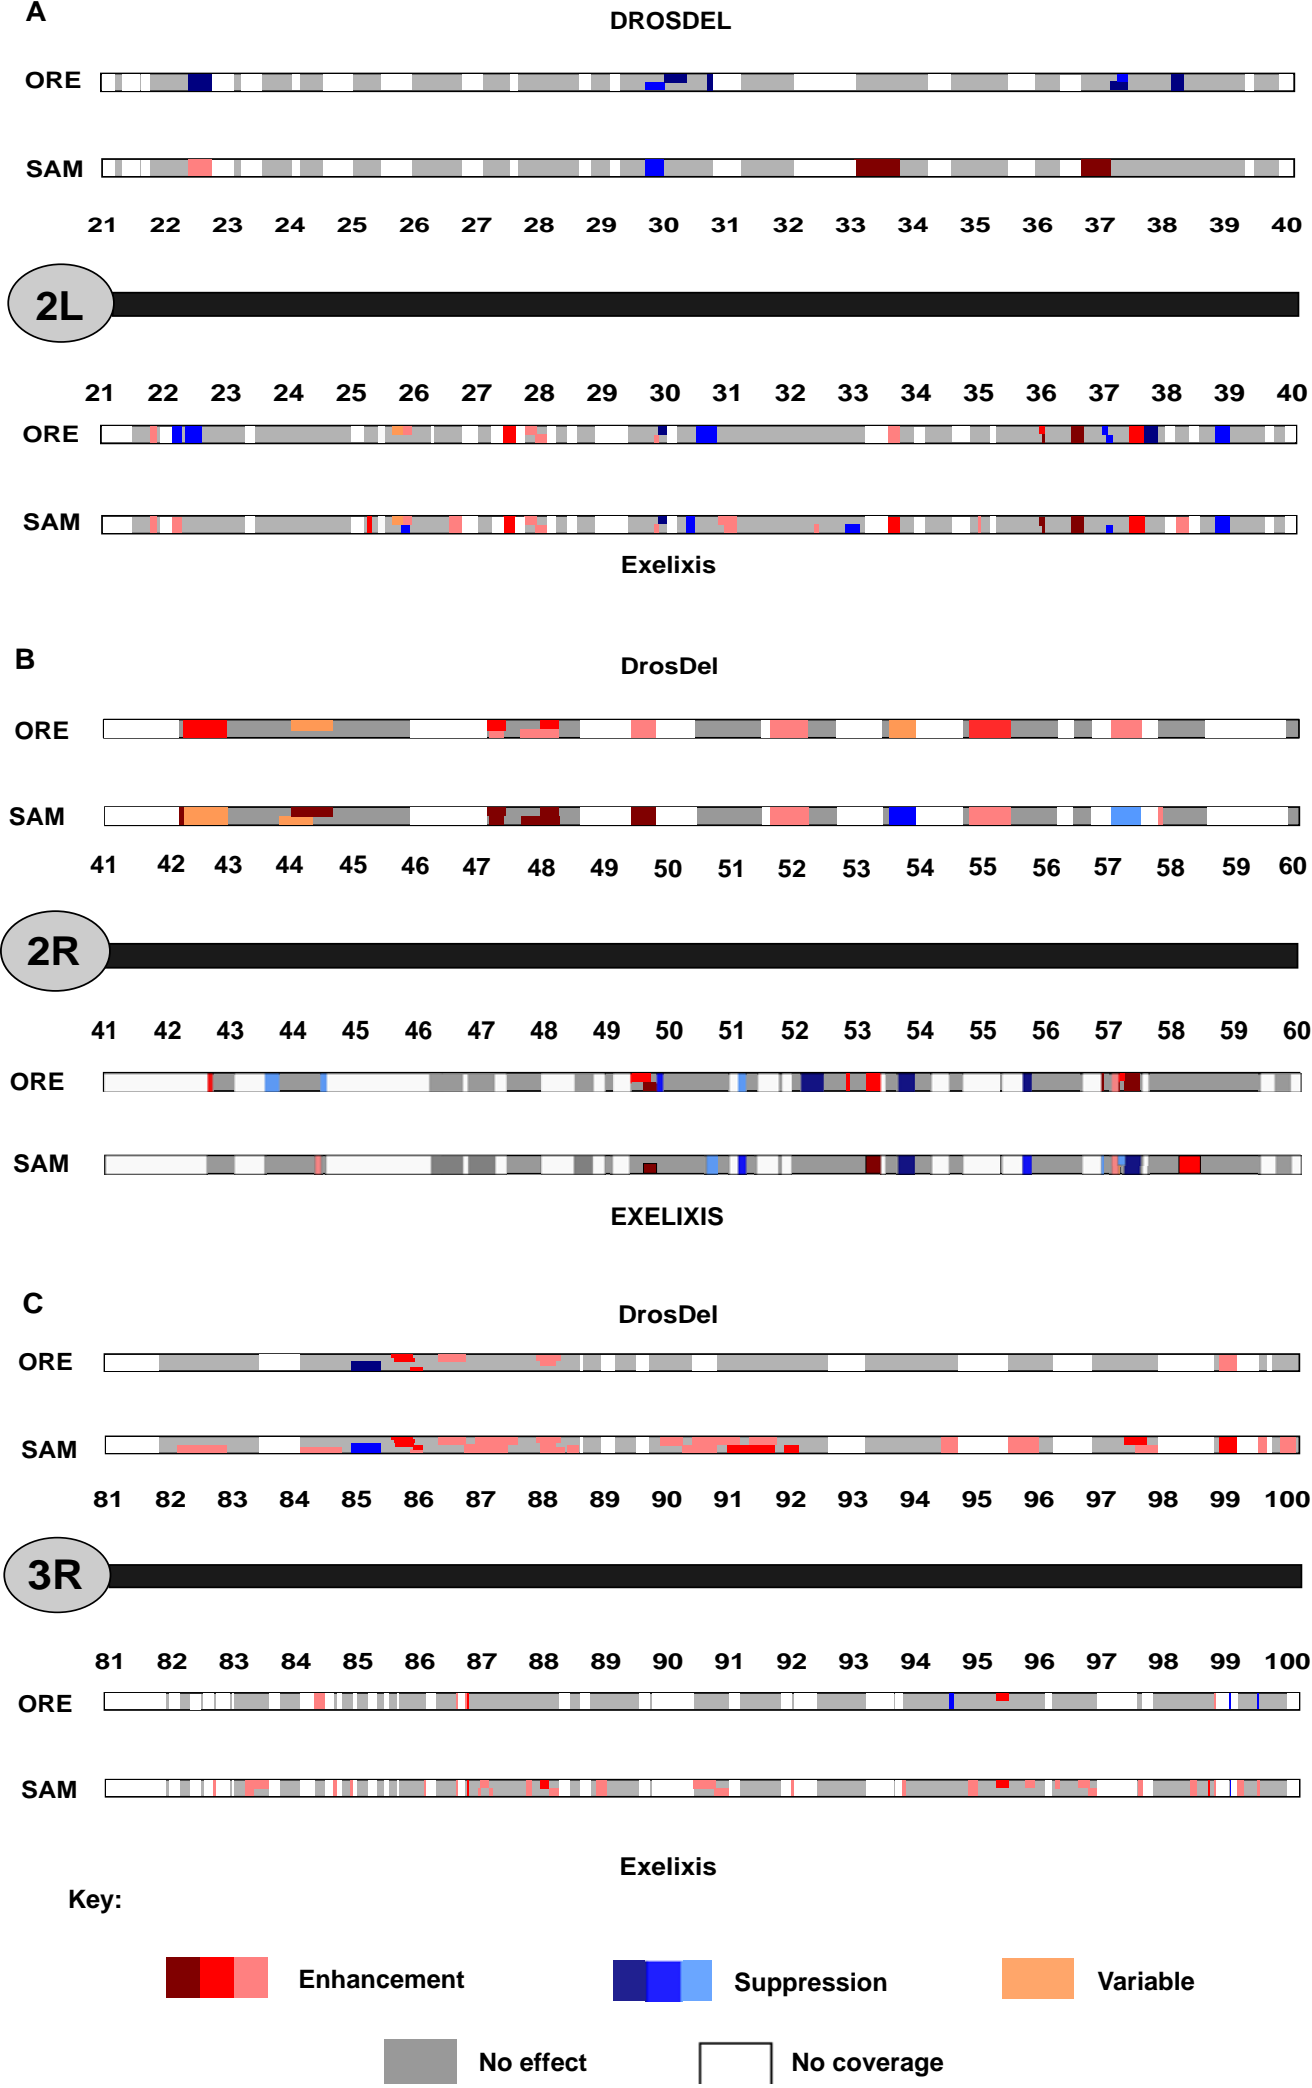

Supplement: pgen.1003661.s004.pdf [file pgen.1003661.s004.pdf]
